# Supplementary material for: Selective DNA Gyrase Inhibitors: Multi-Target in Silico Profiling with 3D-Pharmacophores
Source: MDPI journal article supplement (doi:10.3390/ph14080789), 2021-08-10
Supplement: s1 [file s1]

# Selective DNA Gyrase Inhibitors: Multi-Target *In Silico* Profiling with 3D-Pharmacophores

Tihomir Tomašič <sup>1,\*</sup>, Asta Zubrienė <sup>2</sup>, Žiga Skok <sup>1</sup>, Riccardo Martini <sup>3,4</sup>, Stane Pajk <sup>1</sup>, Izidor Sosič <sup>1</sup>, Janez Ilaš <sup>1</sup>, Daumantas Matulis <sup>2</sup>, and Sharon D. Bryant <sup>3</sup>

<sup>1</sup> University of Ljubljana, Faculty of Pharmacy, Aškerčeva 7, Ljubljana, Slovenia; ziga.skok@ffa.uni-lj.si; stane.pajk@ffa.uni-lj.si; izidor.sosic@ffa.uni-lj.si; janez.ilas@ffa.uni-lj.si

<sup>2</sup> Vilnius university, Life Sciences Center, Institute of Biotechnology, Department of Biothermodynamics and drug design, Saulėtekio 7, Vilnius LT-10257, Lithuania; astzu@ibt.lt; matulis@ibt.lt

<sup>3</sup> Inte:Ligand Softwareentwicklungs- und Consulting GmbH, Mariahilferstrasse 74B, Vienna, Austria; bryant@inteligand.com

<sup>4</sup> Discngine S.A.S., 79 Avenue Ledru Rollin, 75012 Paris, France; riccardo.martini@discngine.com

\* Correspondence: Tihomir.tomasic@ffa.uni-lj.si; Tel.: +386-1-4769-556

## 1. ROC plots from the GyrB ligand-based pharmacophore model validation.

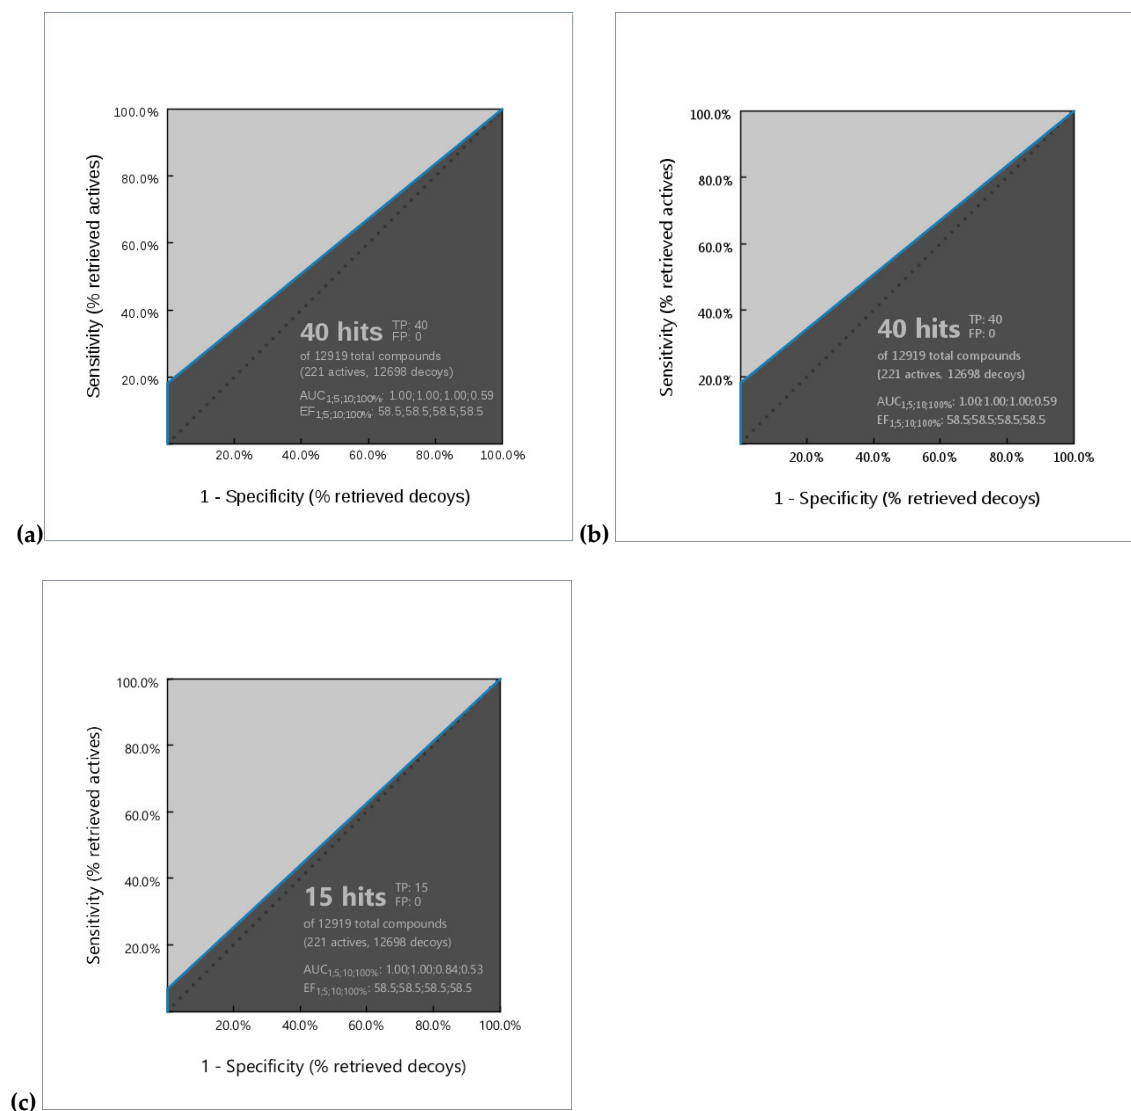

**Figure S1.** Validation phase of **(a) LB-GyrB-Model-5m; (b) LB-GyrB-Model-4; (c) LB-GyrB-Model-6** ligand-based pharmacophore models. Resulting ROC plot (curve shown in blue) from virtually screening 12919 compounds (221 GyrB actives and 12698 generated decoys) with the ligand-based pharmacophore model. TP = true positives; FP = false positives; AUC = area under the curve; EF = enrichment factor.

## 2. ROC plots from the Hsp90 ligand-based pharmacophore model validation.

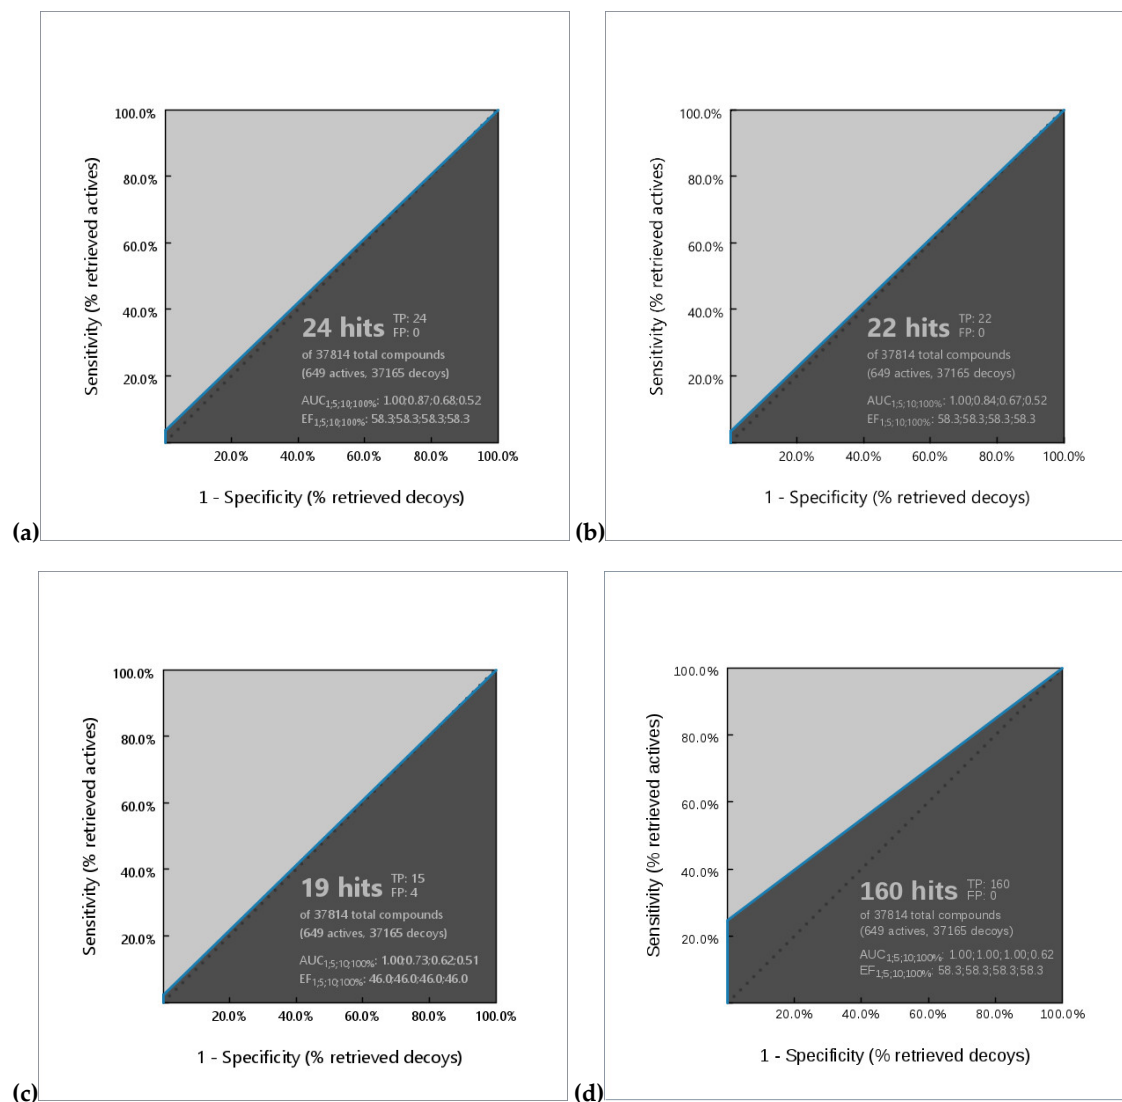

**Figure S2.** Validation phase of (a) LB-Hsp90-Model-3, (b) LB-Hsp90-Model-4, (c) LB-Hsp90-Model-5, and (d) LB-Hsp90-Model-6 Hsp90 ligand-based pharmacophore models. Resulting ROC plot (curve shown in blue) from virtually screening 37814 compounds (649 Hsp90 actives and 37165 generated decoys) with the ligand-based pharmacophore model. TP = true positives; FP = false positives; AUC = area under the curve; EF = enrichment factor.

### 3. ROC plots from the TopoII ligand-based pharmacophore model validation.

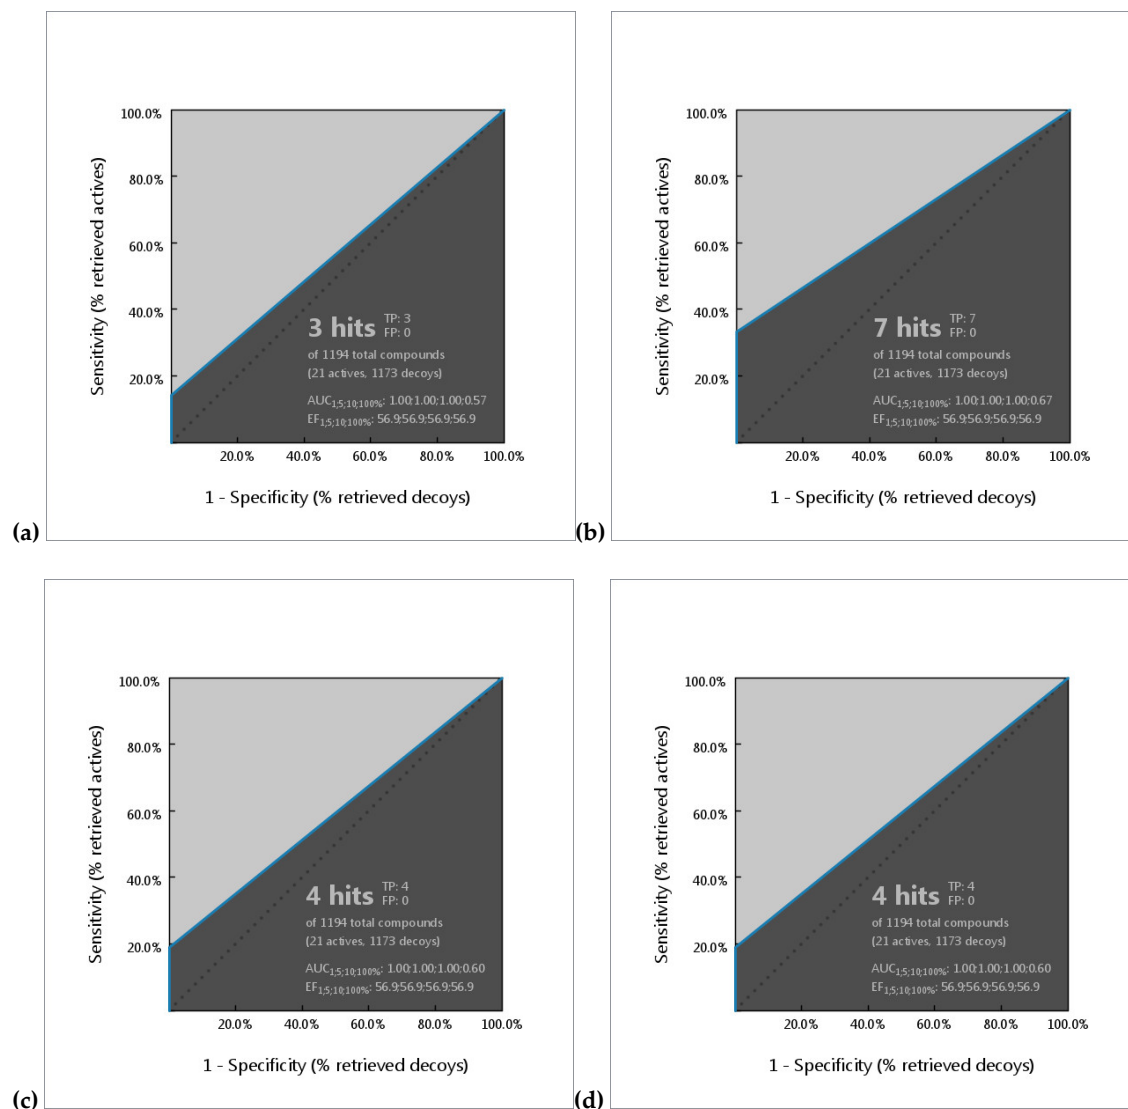

**Figure S3.** Validation phase of (a) **LB-TopoII-Model-1**, (b) **LB-TopoII-Model-2**, (c) **LB-TopoII-Model-3**, and (d) **LB-TopoII-Model-4** TopoII ligand-based pharmacophore models. Resulting ROC plot (curve shown in blue) from virtually screening 1194 compounds (21 TopoII actives and 1173 generated decoys) with the ligand-based pharmacophore model. TP = true positives; FP = false positives; AUC = area under the curve; EF = enrichment factor.
